# Supplementary material
Source: Research Square preprint supplement (doi:10.21203/rs.3.rs-8893802/v1)
Supplement: Supplementary file 1 [file 47cc110e4bfbc207c83d7432.docx]

**Supplementary File**

Enhanced *JAGN1* expression Modulates ER Stress Signaling and Promotes Survival in IRE1-Deficient Arabidopsis

Regina M. Bedgood1, Karolina M. Pajerowska-Mukhtar*1,2

1. Department of Biology, University of Alabama at Birmingham, Birmingham, AL 35294, USA
2. Department of Biological Sciences, Clemson University, Clemson, SC 29634, USA

*corresponding author, kmukhta@clemson.edu

**Supplemental Figures:**


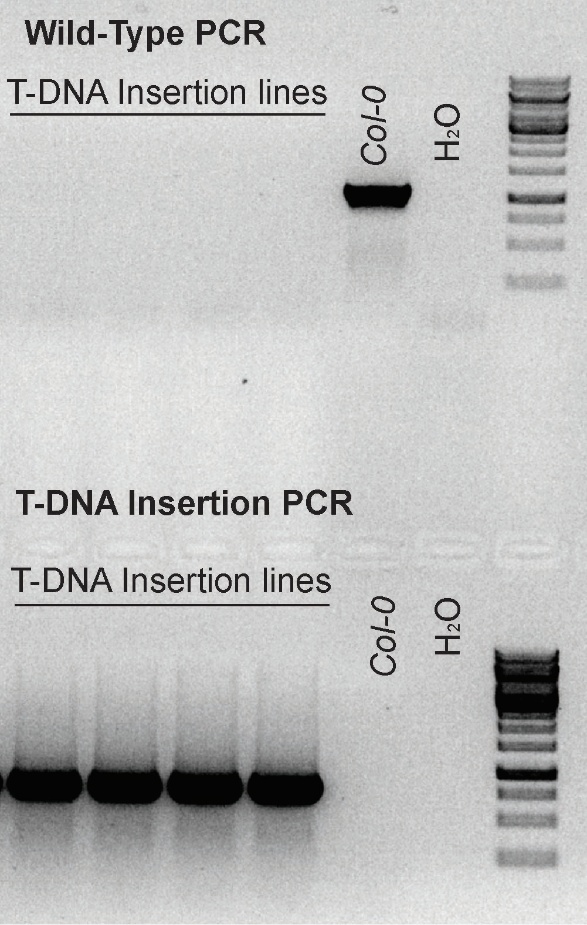


**Supplemental Figure 1. Genotyping of T-DNA insertion line for JAGN1**. Agarose gel of PCR confirmation for homozygosity of T-DNA insertion. The top row of wells is using the wild type primerset and the bottom row of wells is using the T-DNA insertion specific primers.


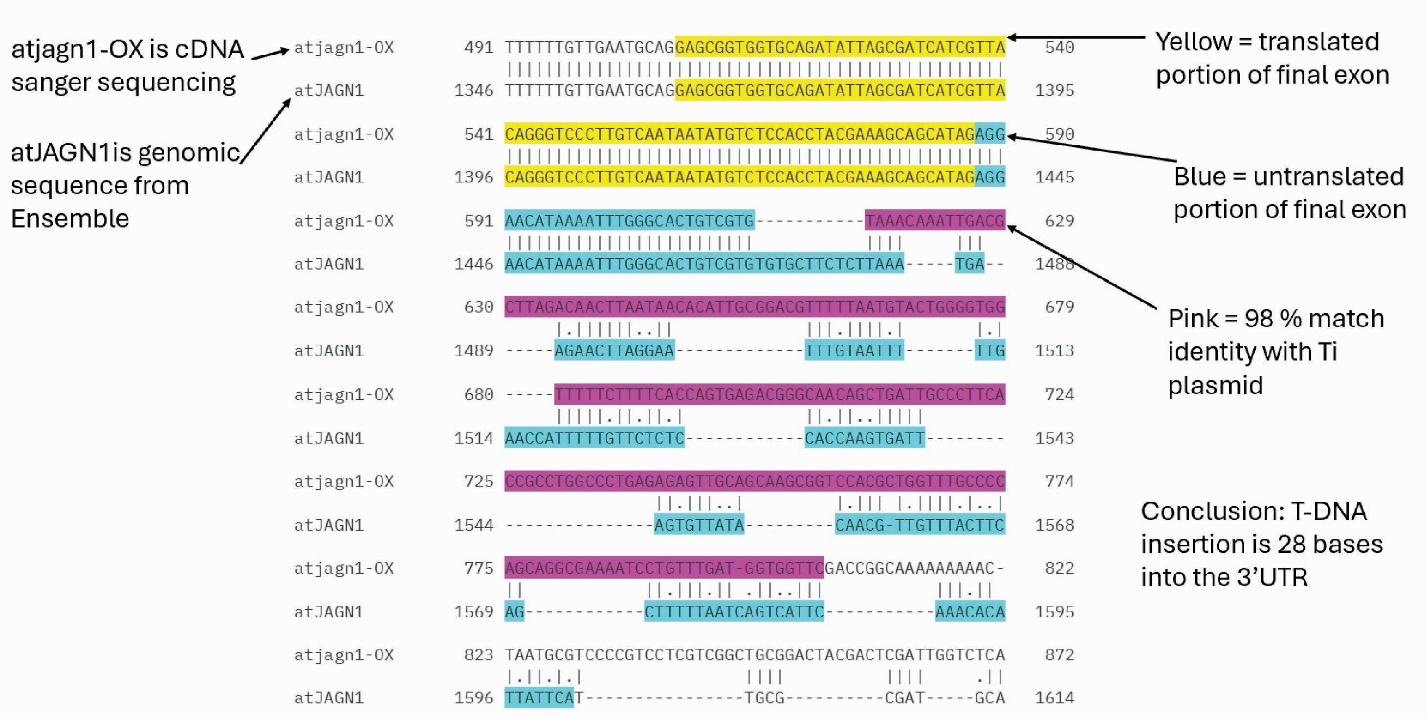


**Supplemental Figure 2. Sanger Sequencing results for jagn1-OX line**. Top row is the T-DNA insertion line and bottom row is the genomic sequence for JAGN1 in Arabidopsis thaliana.


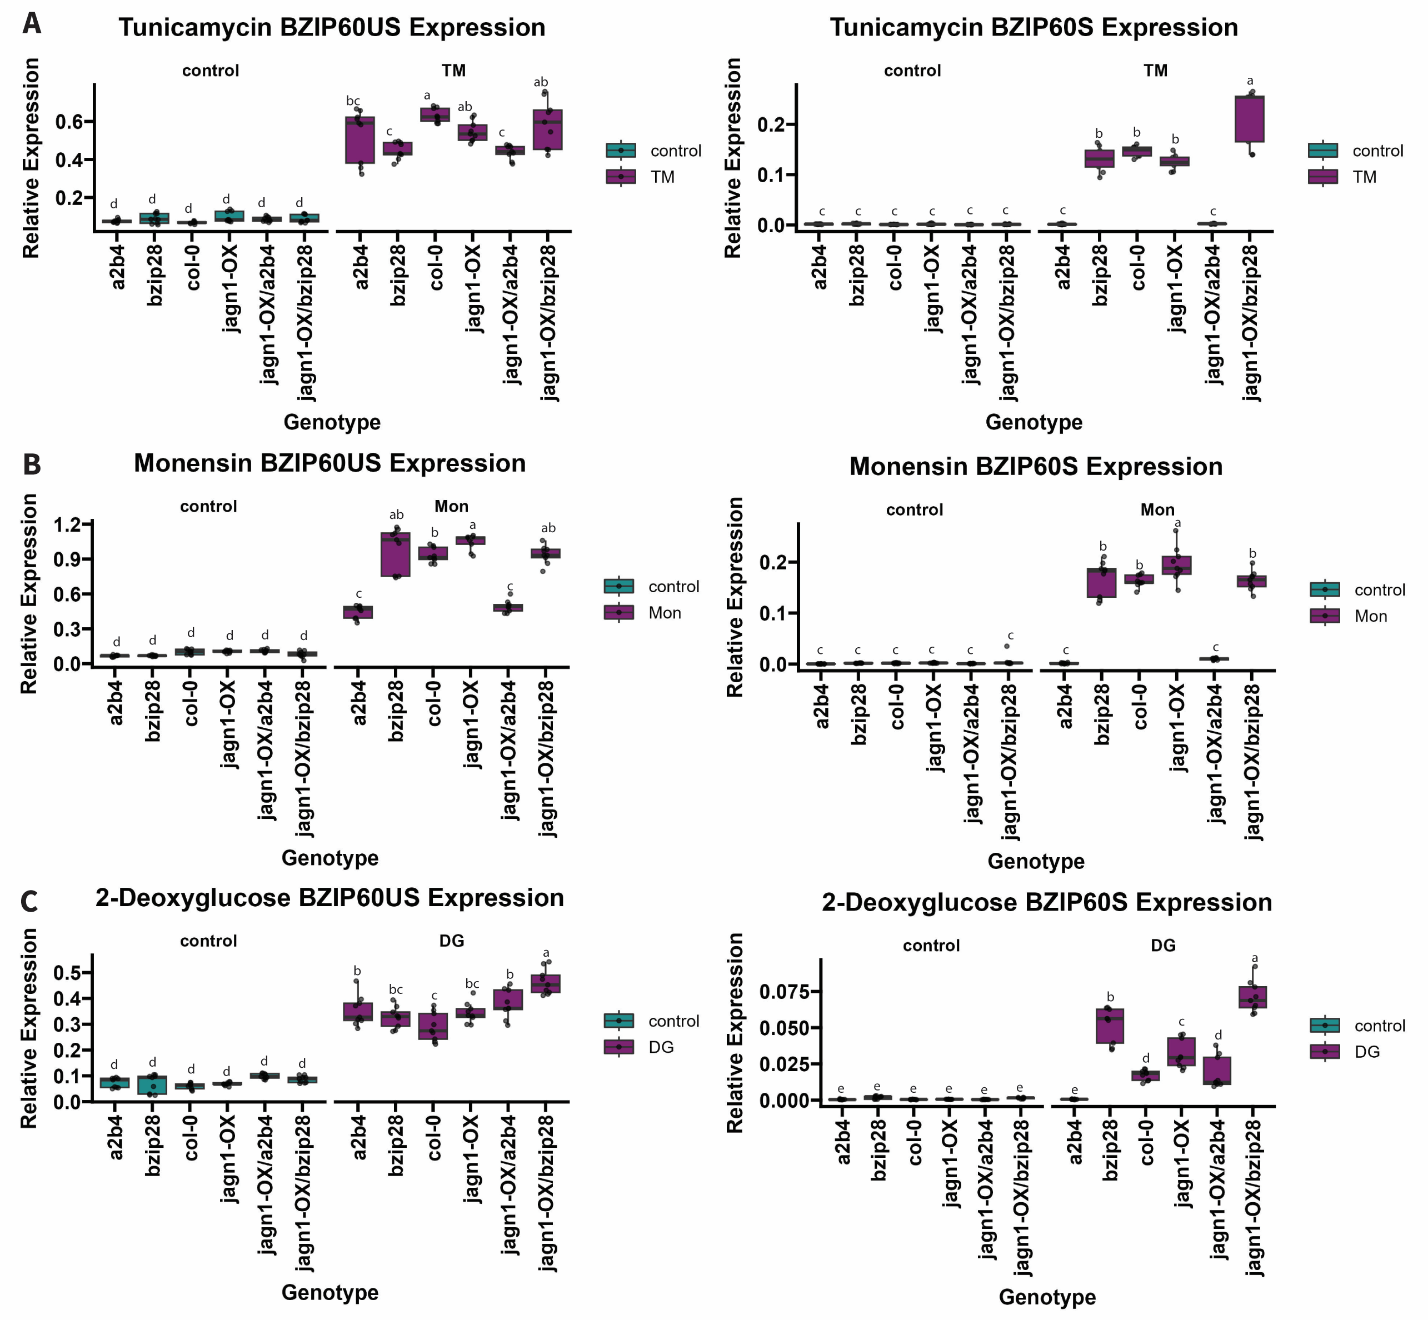


**Supplemental Figure 3. bZIP60 unspliced and spliced expression after stress treatment.** bZIP60 unspliced and spliced relative expression to Ubiquitin 5 housekeeping gene.


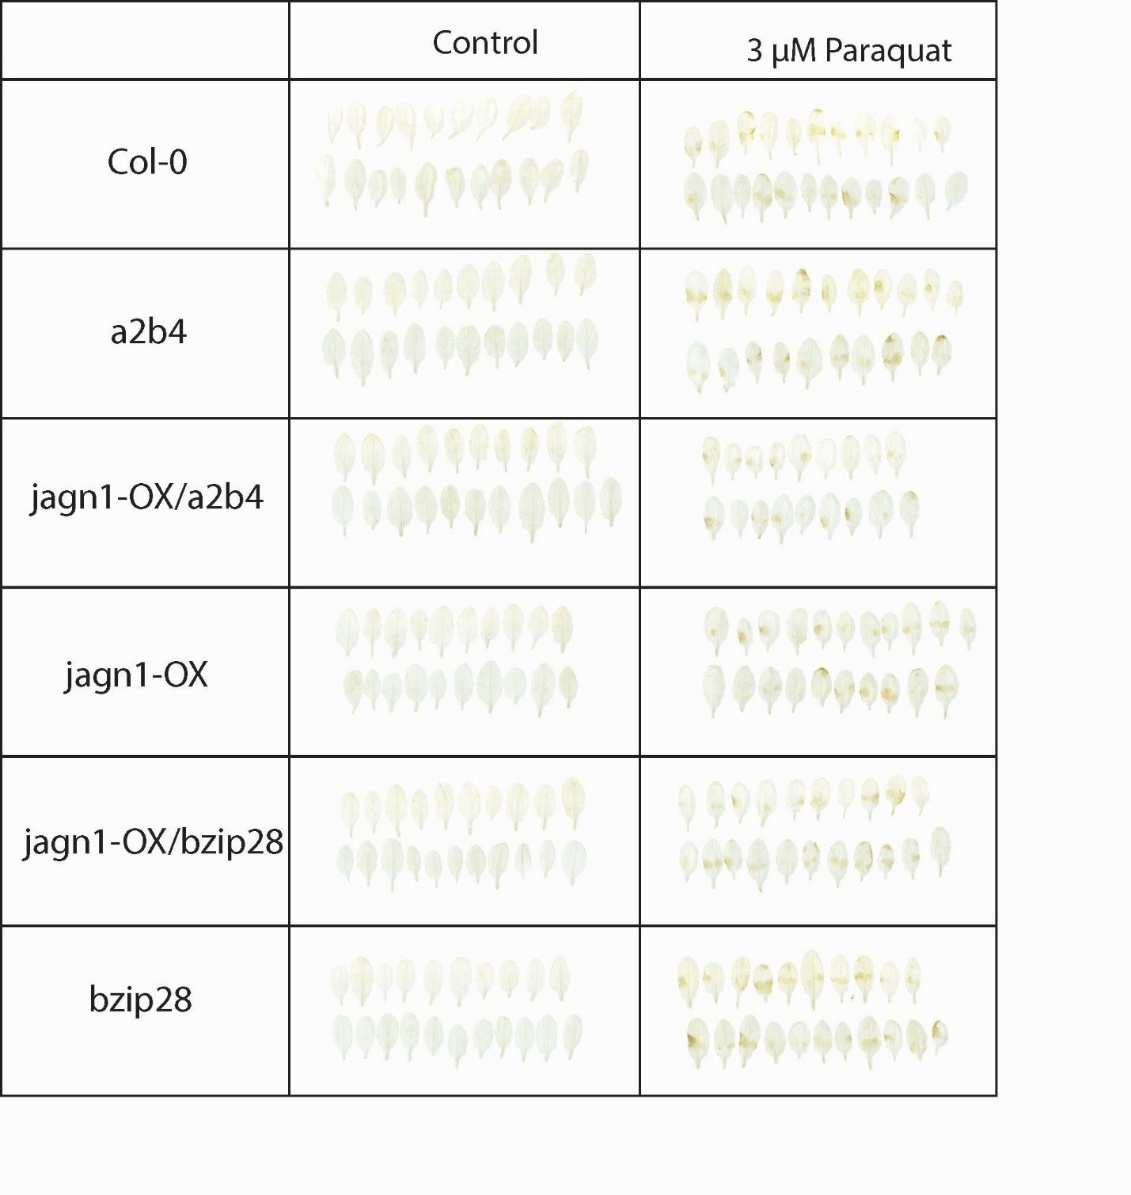


**Supplemental figure 4. Paraquat induced H2O2 production.** 4-week-old plants were infiltrated with 3 μM PQ, 3 leaves per plant. Plants were left to incubate for 24 hours and were collected for DAB staining.


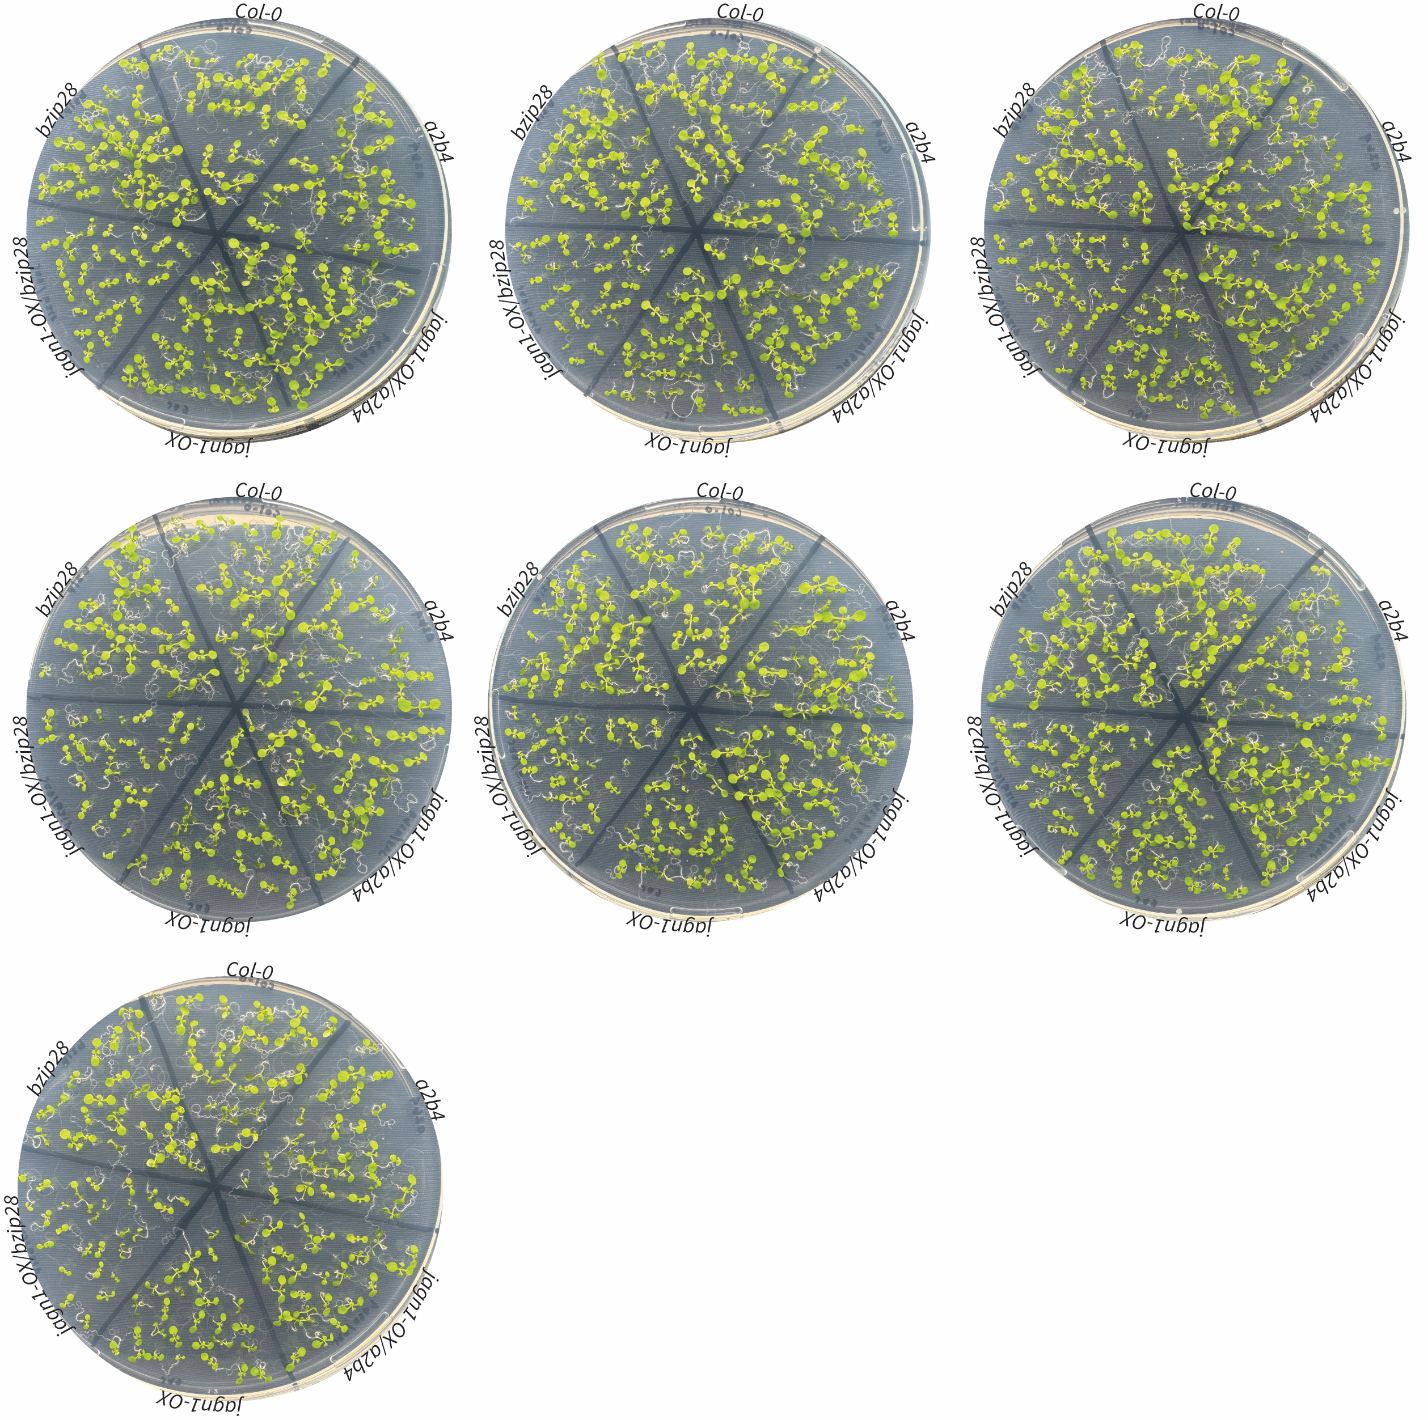


**Supplemental figure 5. MS control plates for survival analysis.** These plates were germinated in tandem with the treatment groups for tunicamycin, monensin, and 2-deoxyglucose. Each plate has 30 seeds per genotype.


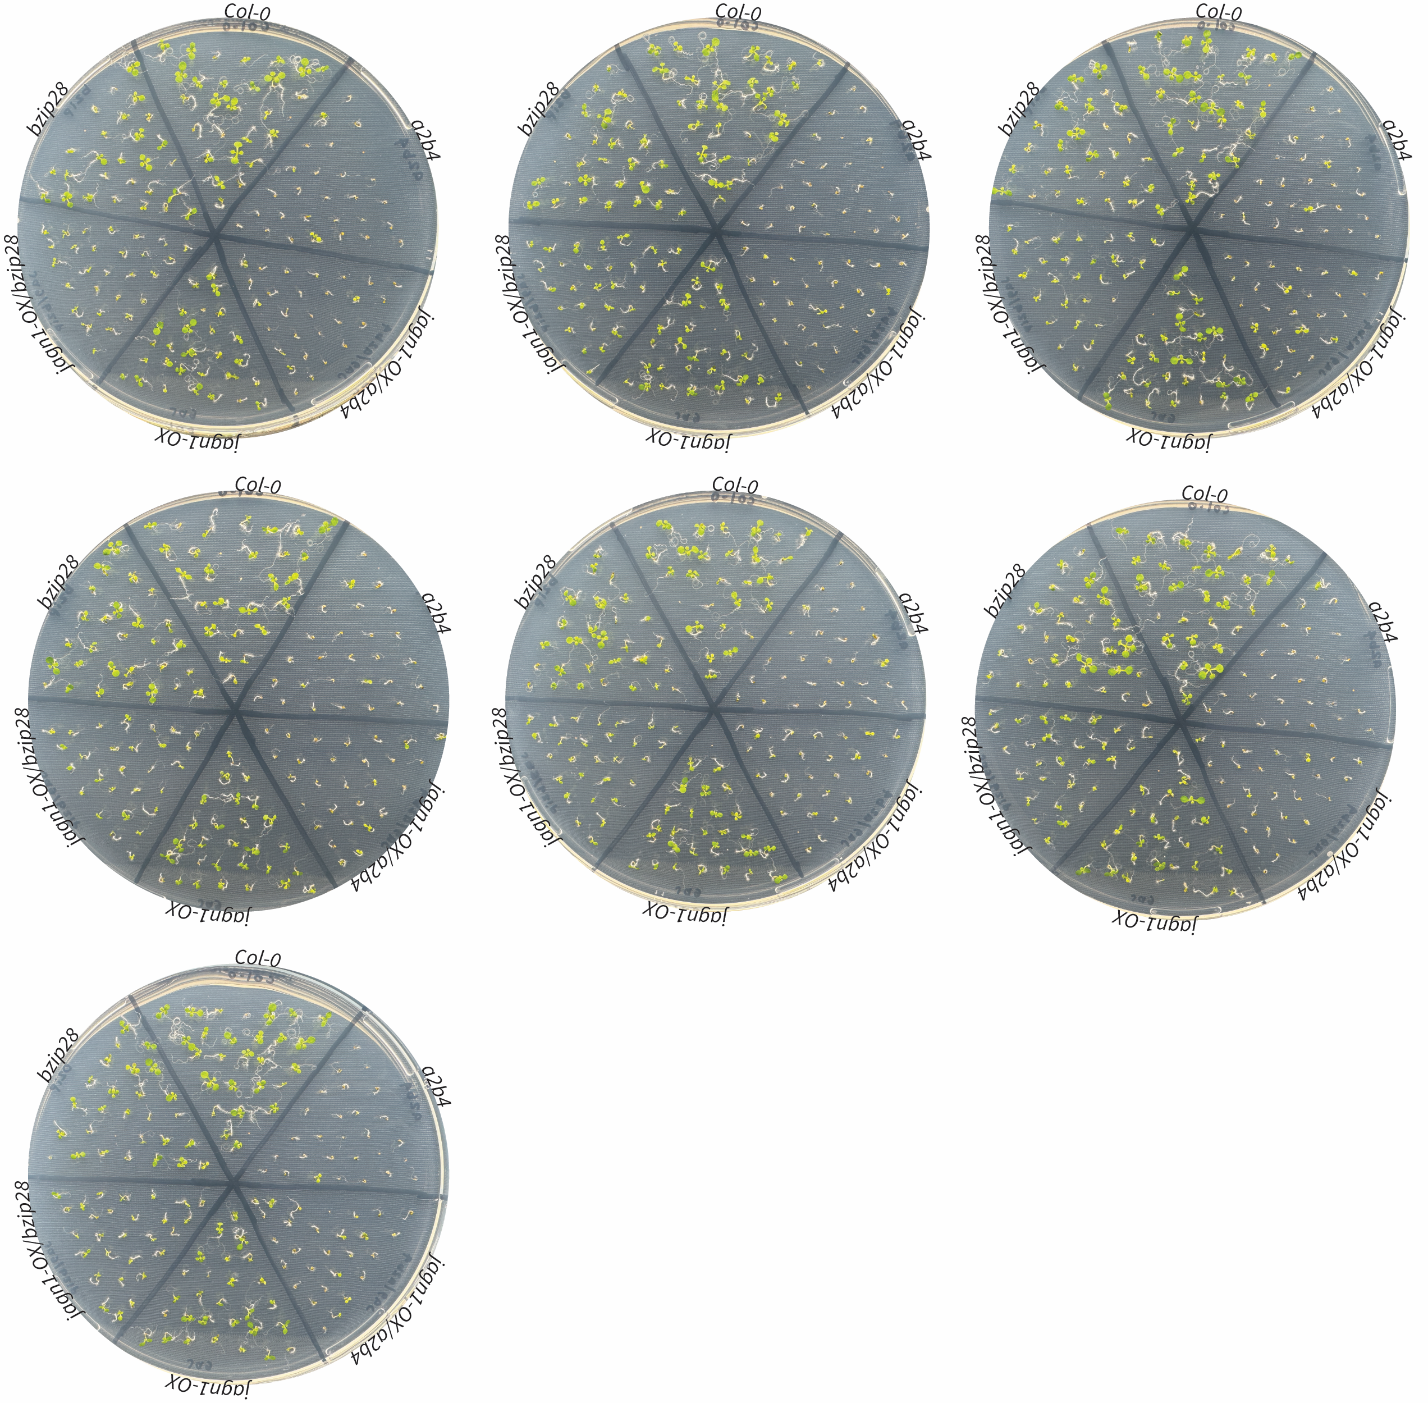


**Supplemental figure 6. Tunicamycin treated seedlings.** Each plate has 30 seeds per genotype.


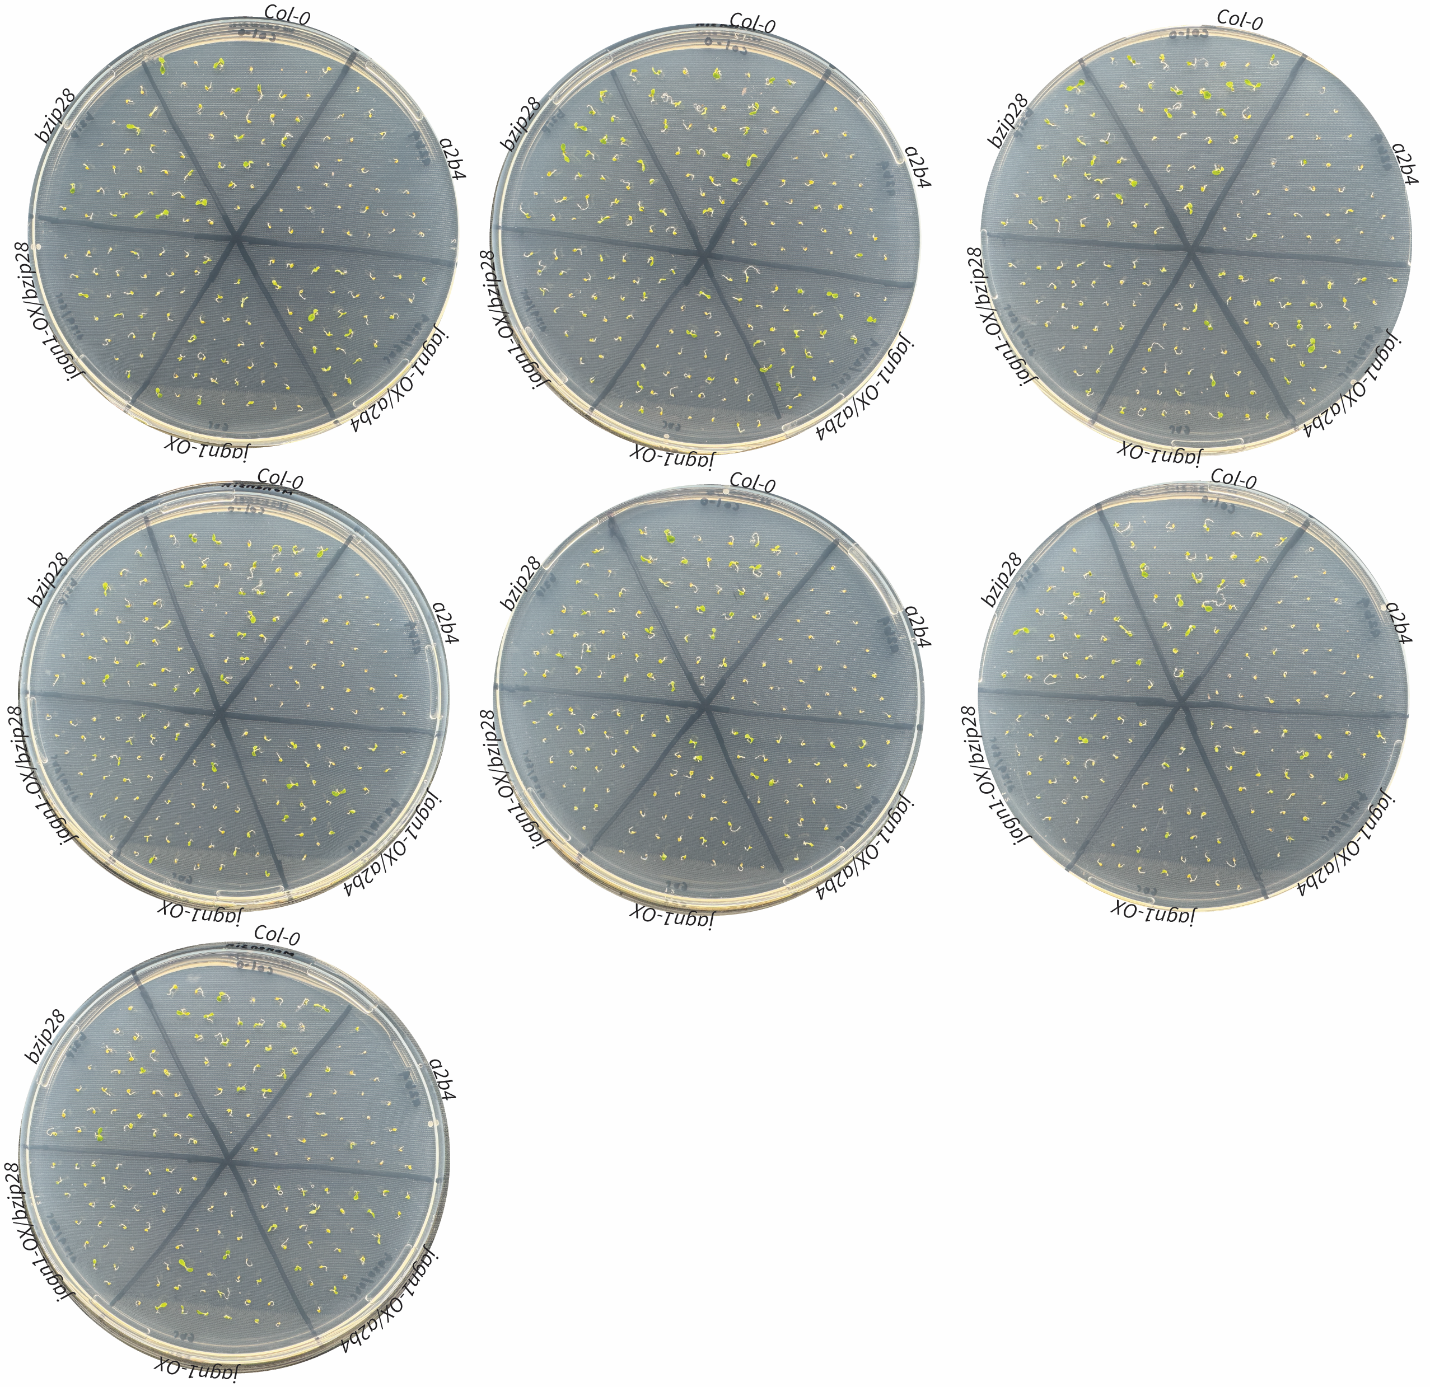


**Supplemental figure 7. Monensin treated seedlings.** Each plate has 30 seeds per genotype.


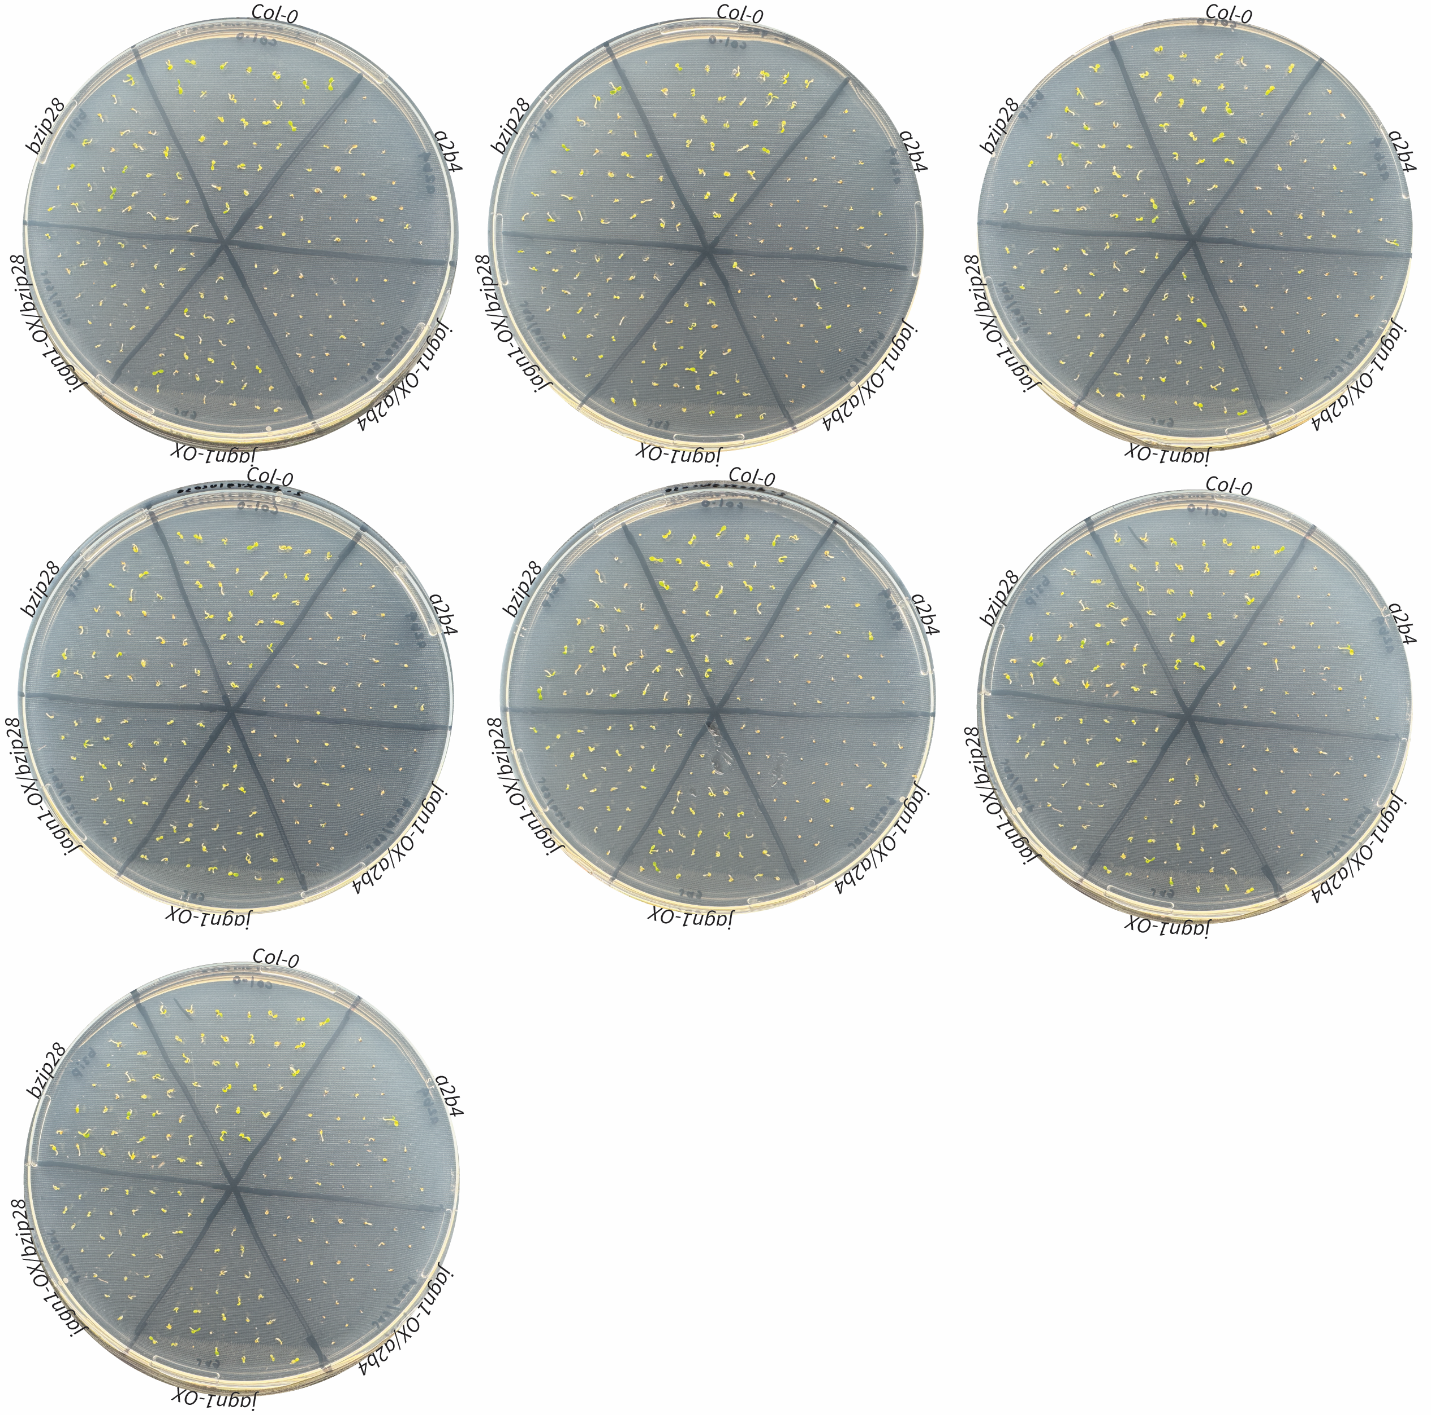


**Supplemental figure 8. 2-Deoxyglucose treated seedlings.** Each plate has 30 seeds per genotype.


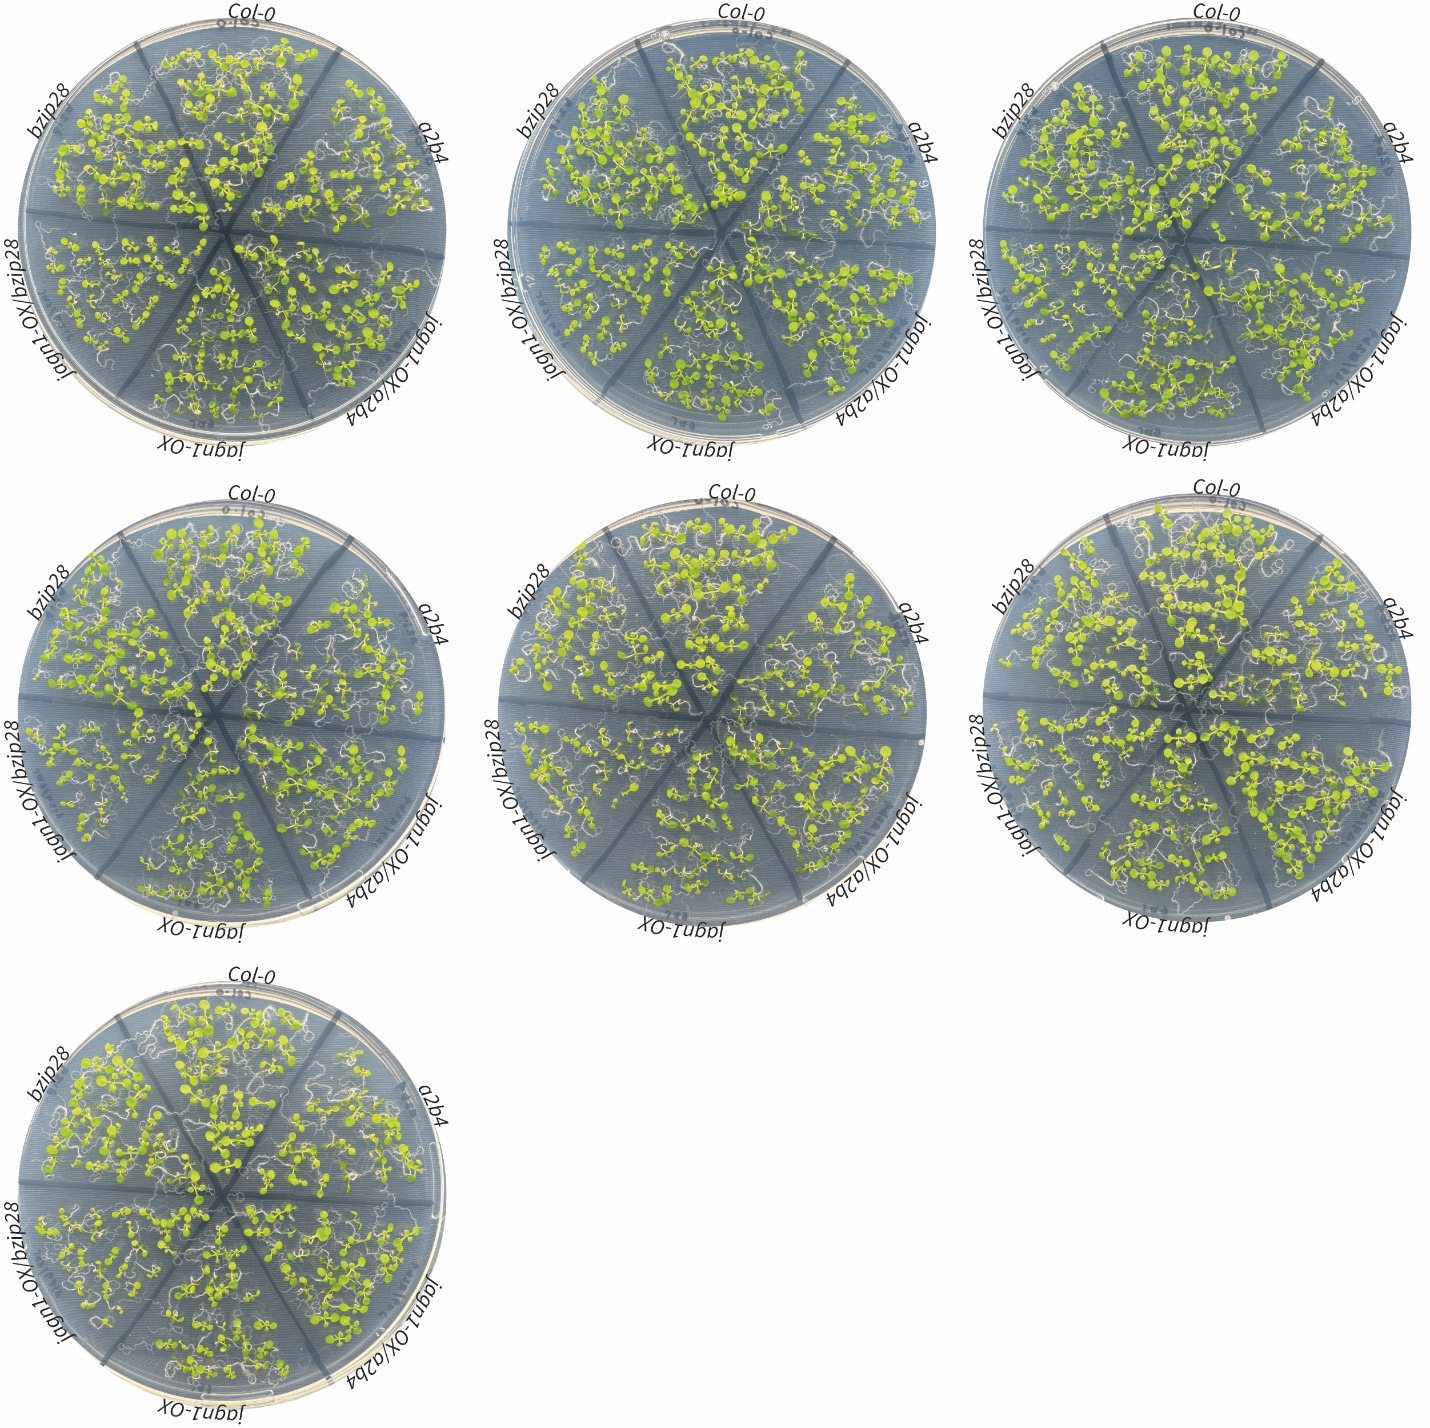


**Supplemental figure 9. MS control plates for survival analysis**. These plates were germinated in tandem with the treatment groups for paraquat and heat. Each plate has 30 seeds per genotype.


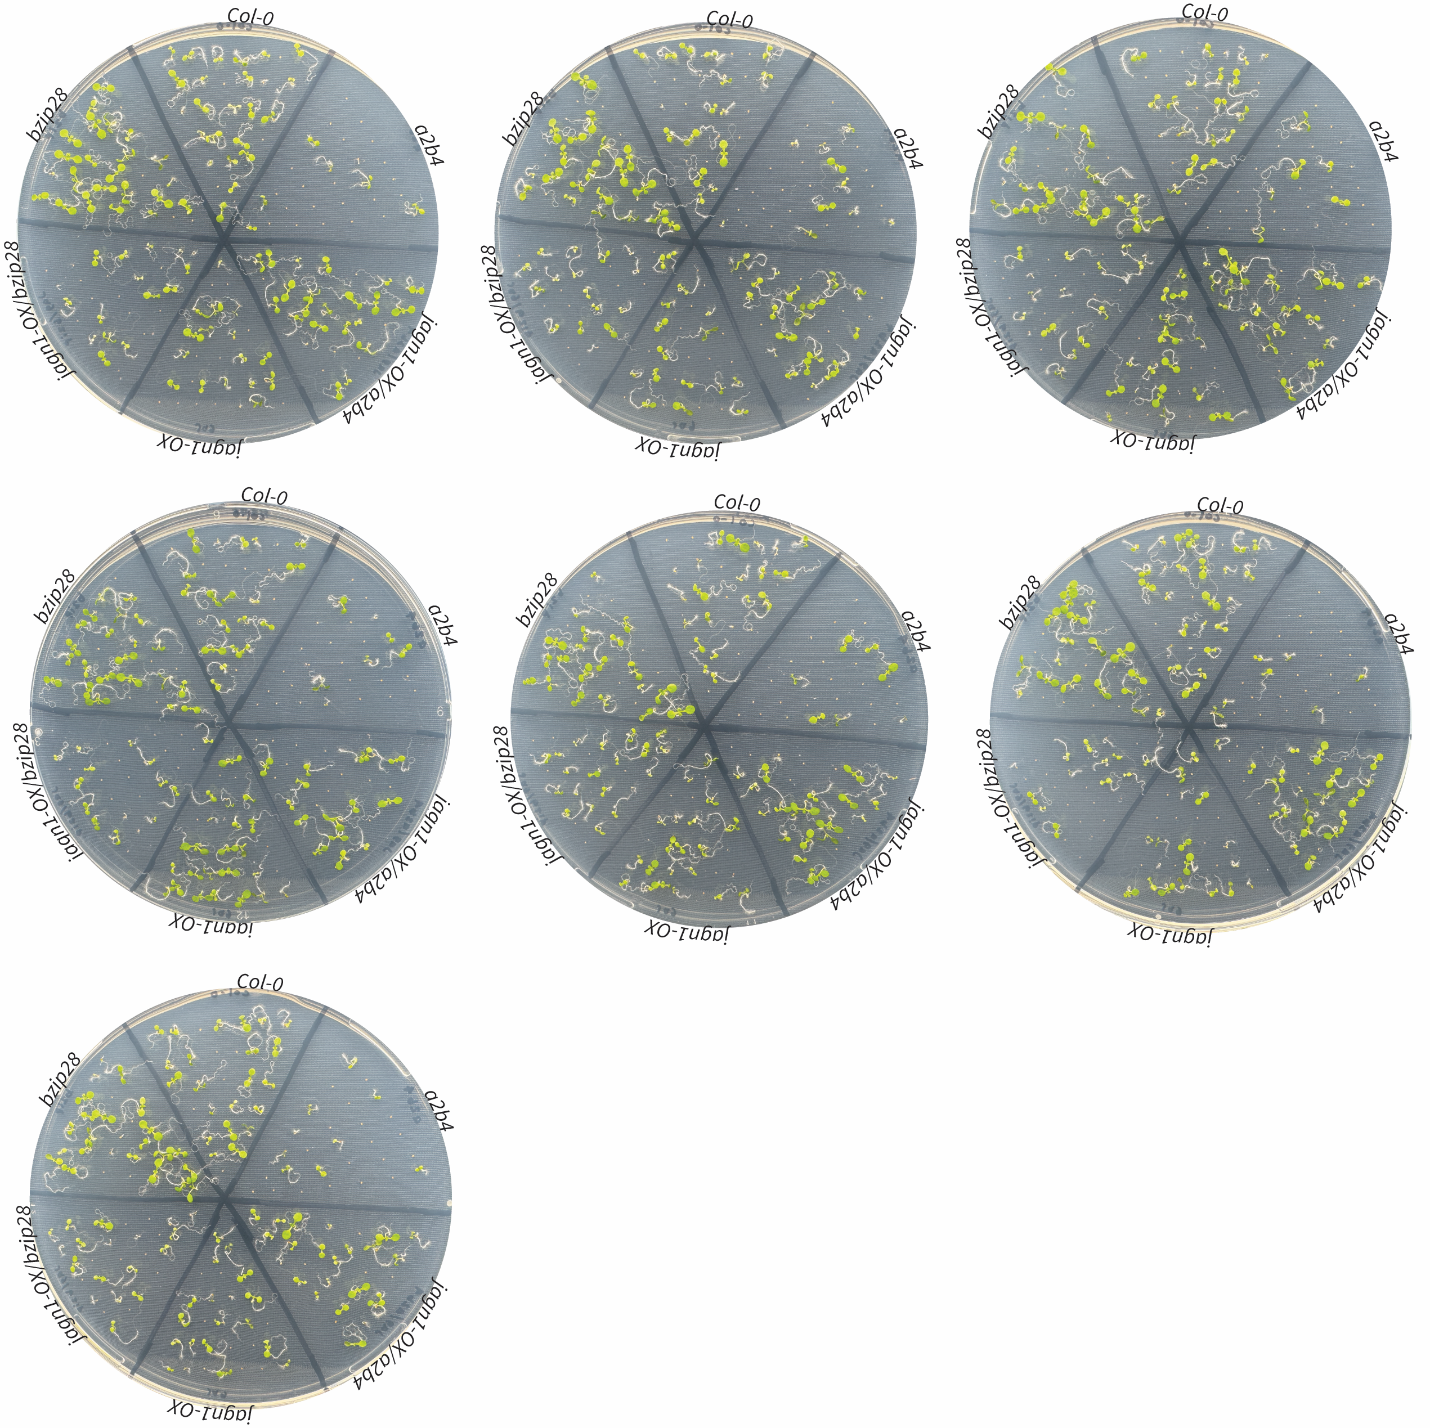


**Supplemental figure 10. Heat**  **treated seedlings.** Each plate has 30 seeds per genotype.


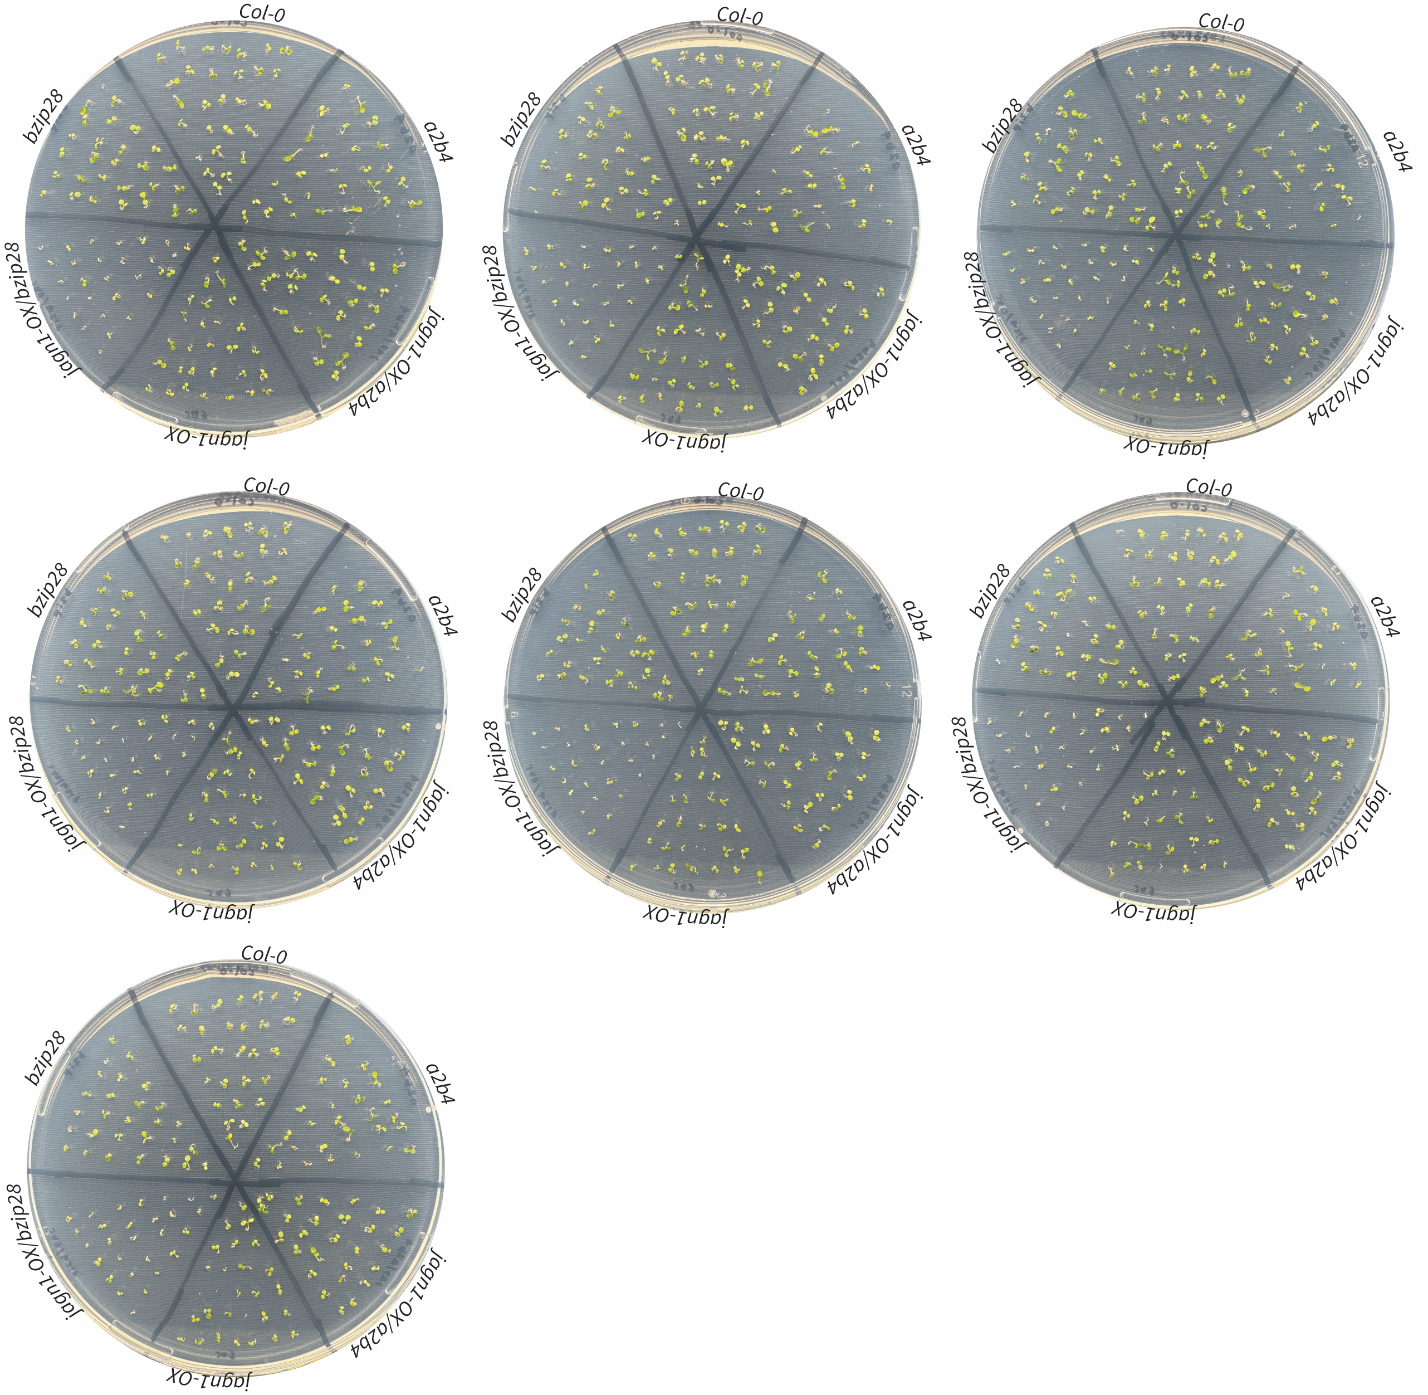


**Supplemental figure 11. Paraquat**  **treated seedlings.** Each plate has 30 seeds per genotype.
